# Supplementary material
Source: PubMed Central journal article supplement (PMC7066688)

Supplemental Figure for:  
Association between Skin Reaction and Clinical Benefit in Patients Treated with Anti-PD-1 Monotherapy for Advanced Non-Small Cell Lung Cancer  
Mari Aso et al.

**Figure S1. Progression-Free Survival in Patients With or Without epidermal growth factor receptor (EGFR) mutation positive**

Kaplan–Meier curves are shown for progression-free survival in patients with or without EGFR mutation positive. The red line indicates patients with EGFR mutation positive; the black line represents those without EGFR mutation positive. Ticks indicate patients for whom data were censored on October 19, 2018. HR, hazard ratio.

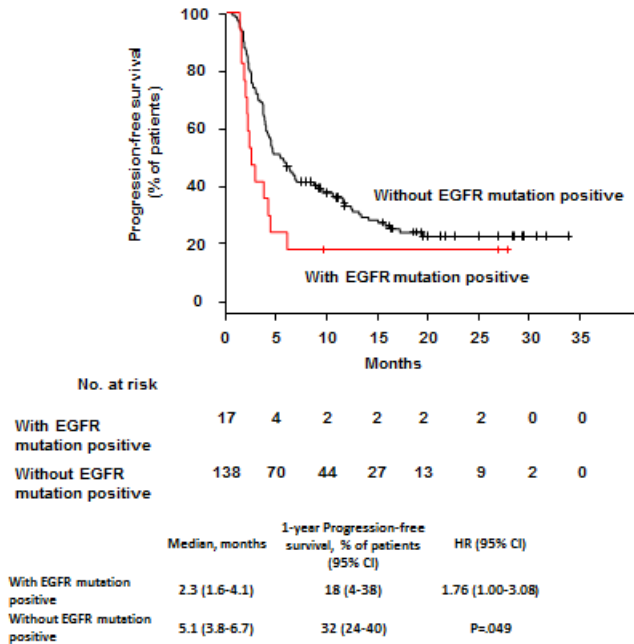

Supplement: ONCO-25-e536-s001.pdf [file ONCO-25-e536-s001.pdf]
