# Supplementary material
Source: PubMed Central journal article supplement (PMC7066688)
Supplement: ONCO-25-e536-s002.pdf [file ONCO-25-e536-s002.pdf]

Supplemental Tables for:  
Association between Skin Reaction and Clinical Benefit in Patients Treated with Anti-PD-1 Monotherapy for Advanced Non-Small Cell Lung Cancer  
Mari Aso et al.

**Table S1. Association between EGFR mutation and best response**

| <b>Variables</b>                              | <b>With EGFR mutation<sup>a</sup></b><br><b>(n = 17)</b> | <b>Without EGFR mutation<sup>b</sup></b><br><b>(n = 138)</b> | <b><i>P</i></b>   |
|-----------------------------------------------|----------------------------------------------------------|--------------------------------------------------------------|-------------------|
| Objective response rate, No. (%) <sup>c</sup> | 2(12%)                                                   | 47(34%)                                                      | .095 <sup>e</sup> |
| Disease control rate, No. (%) <sup>d</sup>    | 8(47%)                                                   | 97(70%)                                                      | .096 <sup>e</sup> |

<sup>a</sup>Patients with epidermal growth factor receptor mutation.

<sup>b</sup>Patients without epidermal growth factor receptor mutation.

<sup>c</sup>Proportion of patients achieving complete or partial response based on modified Response Evaluation Criteria in Solid Tumors version 1.1.

<sup>d</sup>Proportion of patients achieving complete response, partial response, or stable disease based on modified Response Evaluation Criteria in Solid Tumors version 1.1.

<sup>e</sup>By Fisher's exact test.

**TableS2. Association between EGFR mutation and Skin reaction**

|                       | <b>With EGFR<br/>mutation<sup>a</sup></b> | <b>Without EGFR<br/>mutation<sup>b</sup></b> | <b><i>P</i></b>   |
|-----------------------|-------------------------------------------|----------------------------------------------|-------------------|
|                       | <b>(n = 17)</b>                           | <b>(n = 138)</b>                             |                   |
| With skin reaction    | 4(24%)                                    | 47(34%)                                      | 0.55 <sup>c</sup> |
| Without skin reaction | 13(76%)                                   | 91(66%)                                      |                   |

<sup>a</sup>Patients with epidermal growth factor receptor mutation.

<sup>b</sup>Patients without epidermal growth factor receptor mutation.

<sup>c</sup>By Chi-squared test.

**Table S3. Association between Skin reaction and best response in EGFR positive group**

| Variables                                     | With skin reaction <sup>a</sup><br>(n = 4) | Without skin reaction <sup>b</sup><br>(n = 13) | <i>P</i>          |
|-----------------------------------------------|--------------------------------------------|------------------------------------------------|-------------------|
| Objective response rate, No. (%) <sup>c</sup> | 2(50%)                                     | 0(0%)                                          | 0.04 <sup>e</sup> |
| Disease control rate, No. (%) <sup>d</sup>    | 4(100%)                                    | 4(30%)                                         | 0.02 <sup>e</sup> |

<sup>a</sup>Patients who developed skin reaction during nivolumab or pembrolizumab monotherapy.

<sup>b</sup>Patients who did not develop skin reaction during nivolumab or pembrolizumab monotherapy.

<sup>c</sup>Proportion of patients achieving complete or partial response based on modified Response Evaluation Criteria in Solid Tumors version 1.1.

<sup>d</sup>Proportion of patients achieving complete response, partial response, or stable disease based on modified Response Evaluation Criteria in Solid Tumors version 1.1.

<sup>e</sup>By Fisher's exact test.

**Table S4. Association between the Presence of Skin Reactions and Treatment Responses in patients with known TPS**

|                                               | <b>With Skin reaction<sup>a</sup></b> | <b>Without Skin reaction<sup>b</sup></b> | <b><i>P</i></b>   |
|-----------------------------------------------|---------------------------------------|------------------------------------------|-------------------|
|                                               | <b>(n = 27)</b>                       | <b>(n = 63)</b>                          |                   |
| Best response, CR/PR/SD/PD                    | 0/14/13/0                             | 0/14/27/22                               |                   |
| Objective response rate, No. (%) <sup>c</sup> | 14(50%)                               | 14(22%)                                  | .011 <sup>e</sup> |
| Disease control rate, No. (%) <sup>d</sup>    | 27(100%)                              | 41(65%)                                  | .001 <sup>e</sup> |

TPS; Tumor proportion score; CR, complete response; PR, partial response; SD, stable disease; PD, progressive disease.

<sup>a</sup>Patients who developed skin reactions during nivolumab or pembrolizumab monotherapy.

<sup>b</sup>Patients who did not develop skin reactions during nivolumab or pembrolizumab monotherapy.

<sup>c</sup>Proportion of patients achieving complete or partial response based on modified Response Evaluation Criteria in Solid Tumors version 1.1.

<sup>d</sup>Proportion of patients achieving complete response, partial response, or stable disease based on modified Response Evaluation Criteria in Solid Tumors version 1.1.

<sup>e</sup>By Chi-squared test.

**Table S5. Association between the Presence of Skin Reactions and Treatment Responses in patients with TPS  $\geq$ 50%**

|                                               | <b>With Skin reaction<sup>a</sup></b> | <b>Without Skin reaction<sup>b</sup></b> | <b><i>P</i></b>  |
|-----------------------------------------------|---------------------------------------|------------------------------------------|------------------|
|                                               | <b>(n = 15)</b>                       | <b>(n = 18)</b>                          |                  |
| Best response, CR/PR/SD/PD                    | 0/11/4/0                              | 0/8/7/3                                  |                  |
| Objective response rate, No. (%) <sup>c</sup> | 11(73%)                               | 8(44%)                                   | .16 <sup>c</sup> |
| Disease control rate, No. (%) <sup>d</sup>    | 15(100%)                              | 15(83%)                                  | .23 <sup>c</sup> |

TPS; Tumor proportion score; CR, complete response; PR, partial response; SD, stable disease; PD, progressive disease.

<sup>a</sup>Patients who developed skin reactions during nivolumab or pembrolizumab monotherapy.

<sup>b</sup>Patients who did not develop skin reactions during nivolumab or pembrolizumab monotherapy.

<sup>c</sup>Proportion of patients achieving complete or partial response based on modified Response Evaluation Criteria in Solid Tumors version 1.1.

<sup>d</sup>Proportion of patients achieving complete response, partial response, or stable disease based on modified Response Evaluation Criteria in Solid Tumors version 1.1.

<sup>e</sup>By Fisher's exact test.
